## RESEARCH ARTICLE

# Cardiorespiratory coupling in cetaceans; a physiological strategy to improve gas exchange?

Andreas Fahlman<sup>1,2,3,\*</sup>, Stefan Miedler<sup>4</sup>, Luis Marti-Bonmati<sup>3</sup>, Diana Ferrero Fernandez<sup>5</sup>, Paola Muñoz Caballero<sup>5</sup>, Julietta Arenarez<sup>5</sup>, Julie Rocho-Levine<sup>6</sup>, Todd Robeck<sup>7</sup> and Ashley Blawas<sup>8</sup>

## ABSTRACT

In the current study we used transthoracic echocardiography to measure stroke volume (SV), heart rate ( $f_H$ ) and cardiac output (CO) in adult bottlenose dolphins (*Tursiops truncatus*), a male beluga whale calf [*Delphinapterus leucas*, body mass ( $M_b$ ) range: 151–175 kg] and an adult female false killer whale (*Pseudorca crassidens*, estimated  $M_b$ : 500–550 kg) housed in managed care. We also recorded continuous electrocardiogram (ECG) in the beluga whale, bottlenose dolphin, false killer whale, killer whale (*Orcinus orca*) and pilot whale (*Globicephala macrorhynchus*) to evaluate cardiorespiratory coupling while breathing spontaneously under voluntary control. The results show that cetaceans have a strong respiratory sinus arrhythmia (RSA), during which both  $f_H$  and SV vary within the interbreath interval, making average values dependent on the breathing frequency ( $f_R$ ). The RSA-corrected  $f_H$  was lower for all cetaceans compared with that of similarly sized terrestrial mammals breathing continuously. As compared with terrestrial mammals, the RSA-corrected SV and CO were either lower or the same for the dolphin and false killer whale, while both were elevated in the beluga whale. When plotting  $f_R$  against  $f_H$  for an inactive mammal, cetaceans had a greater cardiac response to changes in  $f_R$  as compared with terrestrial mammals. We propose that these data indicate an important coupling between respiration and cardiac function that enhances gas exchange, and that this RSA is important to maximize gas exchange during surface intervals, similar to that reported in the elephant seal.

**KEY WORDS:** Diving physiology, Marine mammals, Cardiac ultrasound, Cetaceans, Aortic flow, Ejection fraction, Dive response, Respiratory sinus arrhythmia

## INTRODUCTION

Variation in heart rate ( $f_H$ ) associated with breathing, often called respiratory sinus arrhythmia (RSA), is seen in most vertebrates (Grossman and Taylor, 2007; Laske et al., 2010; Piccione et al., 2019; Zena et al., 2017). RSA results in the acceleration of  $f_H$  during inspiration, and deceleration during expiration (Mortola et al., 2015). The physiological significance of RSA is debated (Hayano

et al., 1996; Yasuma and Hayano, 2004), but it has been suggested that RSA reduces cardiac work and improves gas exchange by enhancing ventilation–perfusion matching (Ben-Tal et al., 2012, 2014; Yasuma and Hayano, 2004). In terrestrial mammals that breathe almost continuously, RSA is minimal (Piccione et al., 2019), but has been shown to vary with both breathing frequency ( $f_R$ ) and tidal volume ( $V_T$ ) (de Burgh Daly, 1986; Guillén-Mandujano and Carrasco-Sosa, 2014; Hirsch and Bishop, 1981). This variation in  $f_H$  with  $f_R$  and  $V_T$  may not be critically important for comparative studies on terrestrial mammals where breathing is more or less continuous and its effect on cardiac function may not cause large variation in average  $f_H$ . However, in animals that breathe apneustically, like marine mammals, variation in  $f_R$  may cause large variation in  $f_H$ , thereby confounding temporal averages of  $f_H$ .

In marine mammals, and specifically cetaceans, where breaths are separated by long respiratory pauses (Fahlman et al., 2017), significant changes in  $f_H$  have been observed following a breath (Andrews et al., 1997; Bickett et al., 2019; Castellini et al., 1994a,b; Cauture et al., 2019; Elmegaard et al., 2016; Elsner et al., 1966; Fahlman et al., 2019b; Harms et al., 2013; Houser et al., 2010; Kaczmarek et al., 2018; McDonald et al., 2018; Miedler et al., 2015; Noren et al., 2004, 2012; Reed et al., 2000; Williams et al., 1993). Variation in  $f_R$  is expected to have a large effect on average  $f_H$ , but despite this, most studies on cardiac function in marine mammals do not report  $f_R$  or the magnitude of RSA. For this reason, it has been suggested that studies that investigate cardiovascular changes with diving should estimate and report the RSA-corrected  $f_H$  for an inactive animal (Cauture et al., 2019; Fahlman et al., 2019b). However, RSA-correcting data does not provide a true estimate of the average  $f_H$ , stroke volume (SV) or cardiac output (CO) as it omits the dynamic period from the end of the breath until the instantaneous  $f_H$  ( $i f_H$ ) and SV ( $iSV$ ) have stabilized after about 10–12 s (Cauture et al., 2019; Fahlman et al., 2017). Still, the RSA-corrected  $f_H$  and SV provide a means to compare values between studies and species that are independent of  $f_R$ . Thus, a better understanding of the cardiorespiratory coupling between  $f_H$  and  $f_R$  is warranted and may provide improved understanding how marine mammals balance the trade off between gas exchange during apneustic periods with the periods of tachycardia while breathing.

Given the limited work that has been done on cardiorespiratory coupling, the confounding effect of  $f_R$  on  $f_H$ , the potential effect of RSA on gas exchange, and the possible common mechanism to the diving bradycardia, this study was aimed at providing comparative estimates of cardiorespiratory function in cetaceans. We measured semi-continuous  $f_H$  and SV, and calculated CO using transthoracic echocardiography immediately following inhalation in the bottlenose dolphin [*Tursiops truncatus* (Montagu 1821)]. We hypothesized that changes in CO during the respiratory cycle would mainly be governed by changes in  $f_H$  as has been reported in other marine mammals during short apneas (Blix et al., 1983; Blix et al., 1976; Elsner et al., 1964;

<sup>1</sup>Global Diving Research, Inc., Ottawa, ON, K2J 5E8, Canada. <sup>2</sup>Research Department, Fundación Oceanográfica de la Comunitat Valenciana, Gran Vía Marqués del Turia 19, 46005 Valencia, Spain. <sup>3</sup>Research Group on Biomedical Imaging (GIBI230), Instituto de Investigación Sanitaria la Fe, 46026 Valencia, Spain. <sup>4</sup>Veterinary Cardiology, Plaza Mayor 7/10, 46120 Alboraya, Valencia, Spain. <sup>5</sup>Biology Department, Avanza-Oceanográfico SL, Gran Vía Marqués del Turia 19, 46005 Valencia, Spain. <sup>6</sup>Dolphin Quest, Oahu, 5000 Kahala Ave, Honolulu, HI 96816, USA. <sup>7</sup>SeaWorld Orlando, Orlando, FL 32821, USA. <sup>8</sup>Nicholas School of the Environment, Duke University Marine Laboratory, Beaufort, NC 28516, USA.

\*Author for correspondence (afahlman@whoi.edu)

© A.F., 0000-0002-8675-6479; S.M., 0000-0002-6872-9725

**List of abbreviations**

|        |                                                                                                                                              |
|--------|----------------------------------------------------------------------------------------------------------------------------------------------|
| CO     | cardiac output (l min <sup>-1</sup> )                                                                                                        |
| ECG    | electrocardiogram                                                                                                                            |
| $f_H$  | heart rate, calculated over a certain period of time (beats min <sup>-1</sup> )                                                              |
| $f_R$  | breathing frequency, calculated over a certain period of time (breaths min <sup>-1</sup> )                                                   |
| $if_H$ | instantaneous heart rate, calculated for each heart rate as 60 s divided by the period between R-peaks, (beats min <sup>-1</sup> )           |
| $if_R$ | instantaneous breathing frequency, calculated for each breath as 60 s divided by the period between two breaths (breaths min <sup>-1</sup> ) |
| $M_b$  | body mass (kg)                                                                                                                               |
| sCO    | mass-specific cardiac output (ml min <sup>-1</sup> kg <sup>-1</sup> )                                                                        |
| $sf_H$ | mass-specific heart rate (beats min <sup>-1</sup> kg <sup>-1</sup> )                                                                         |
| sSV    | mass-specific stroke volume (ml kg <sup>-1</sup> )                                                                                           |
| SV     | stroke volume, the volume of blood pumped out by the heart for each beat (ml beat <sup>-1</sup> )                                            |
| $V_T$  | tidal volume, the volume inhaled or exhaled during a breath                                                                                  |

Murdaugh et al., 1966). We also collected transthoracic echocardiography data from an adult false killer whale [*Pseudorca crassidens* (Owen 1846)] and a juvenile beluga whale [*Delphinapterus leucas* (Pallas 1776)] while breathing at the surface at rest. These data were used to test the hypothesis that cardiac parameters in cetaceans at rest are allometrically similar to those of terrestrial mammals. In addition, we also included previously published continuous  $if_H$  from the bottlenose dolphin, with new data collected from the false killer whale, beluga whale, killer whale [*Orcinus orca* (Linnaeus 1758)] and pilot whale [*Globicephala macrorhynchus* Gray 1846] to better define how  $f_H$  is modulated by breathing. These data were used to test the hypothesis that the relationship between  $f_R$  and  $f_H$  for inactive animals is similar in cetaceans as compared with terrestrial mammals.

**MATERIALS AND METHODS****Animals**

Ultrasound continuous flow Doppler ultrasound was used to measure  $f_H$  and SV at the level of the left ventricular outflow tract

from one adult female false killer whale housed at Sea Life Park (Hawaii-USA, January 2017), and one juvenile male beluga whale calf at the Oceanogràfic (Valencia-Spain, March/April 2017) (Table 1). In addition, we included previously published cardiovascular and/or respiratory data from 10 adult male and 3 adult female Atlantic bottlenose dolphins (Fahlman et al., 2019a,b). The animal ID, sex, body mass ( $M_b$ ), year of birth (known or estimated) and aortic valve orifice diameter are summarized in Table 1. For the false killer whale, the  $M_b$  was estimated from length and girth, while for all other animals,  $M_b$  was measured.

We used previously published electrocardiogram (ECG) data for up to 10 min in the bottlenose dolphin, and we added measured ECG from the juvenile beluga whale and the adult false killer whale. In addition, we collected ECG data from adult pilot whales ( $n=3$ ) and killer whales ( $n=3$ ), located at SeaWorld Orlando, while they were breathing at the surface (Table 1).

The study protocols were accepted at each facility, as well as by the Animal Care and Welfare Committee at the Oceanogràfic (OCE-17-16, amendments OCE-29-18 and OCE-3-19i) and the Bureau of Medicine (BUMED, NRD-1015).

**Experimental trials**

All experiments were performed using operant conditioning as previously detailed (Fahlman et al., 2019a,b). Participation by each individual was voluntary, and the animals were not restrained and could refuse to participate or withdraw at any point during the experimental trial without any negative consequences. None of the animals participating in this study were fasted. Each experiment (trial) consisted of an animal floating stationary in the water in left lateral recumbency with the blow-hole out of the water, allowing ultrasound probe placement over the left thoracic wall to find the left ventricle. In a few dolphins ( $n=8$ ), the false killer whale ( $n=1$ ), the beluga whale ( $n=1$ ), the pilot whales ( $n=3$ ) and the killer whales ( $n=3$ ), we also collected continuous ECG by placing three custom electrodes on the ventral surface (see below).

**Table 1. Morphometric details of participating animals**

| Animal ID   | Species | Sex | $M_b$ (kg)      | Birth year | AVO diameter (cm) | $f_R$ (breaths min <sup>-1</sup> ) |
|-------------|---------|-----|-----------------|------------|-------------------|------------------------------------|
| Oo1         | Oo      | F   | 1904            | 2006       |                   |                                    |
| Oo2         | Oo      | F   | 1974            | 2007       |                   |                                    |
| Oo3         | Oo      | F   | 2375            | 1976       |                   |                                    |
| Gm1         | Gm      | F   | 671             | 2011       |                   |                                    |
| Gm2         | Gm      | F   | 741             | 2011       |                   |                                    |
| Gm3         | Gm      | M   | 1122            | 2011       |                   |                                    |
| KE          | Pc      | F   | 500–545         | –          | 7.1               | 4.5±2.1                            |
| RNV18-00508 | DI      | M   | 160±15 (162±20) | 2016       | 5.4               | 1.9±1.5                            |
| Tt4529      | Tt      | F   | 159             | 1989       | 3.1               | 3.6±1.5                            |
| *Tt9772     | Tt      | M   | 164             | 1992       | 3.0               | 5.5±1.9                            |
| *Tt7601     | Tt      | M   | 182             | 2004       | 3.2               | 4.8±1.3                            |
| *Tt6511     | Tt      | M   | 140             | 2013       | 3.2               | 6.0±2.7                            |
| *Tt8725     | Tt      | F   | 161             | 2003       | 3.4               | 7.0±3.1                            |
| *Tt4560     | Tt      | M   | 151             | 2006       | 3.4               | 6.8±3.2                            |
| *Tt5550     | Tt      | F   | 146             | 2006       | –                 | NA                                 |
| *83H1       | Tt      | M   | 140             | 2008       | 3.4               | 4.6±2.5                            |
| *9FL3       | Tt      | M   | 235             | 1997       | 3.2               | 4±3.8                              |
| *9ON6       | Tt      | M   | 184             | 2000       | 3.4               | 4.4±3.8                            |
| *01L5       | Tt      | M   | 155             | 1985       | 3.2               | 5±4.2                              |
| *63H4       | Tt      | M   | 171             | 1991       | –                 | 5.7±4.5                            |
| *6JK5       | Tt      | M   | 207             | 1995       | 3.6               | 4.8±2.5                            |
| *99L7       | Tt      | M   | 178             | 1994       | –                 | 4.7±3.1                            |

Oo, *Orcinus orca*; Gm, *Globicephala macrorhynchus*; Pc, *Pseudorca crassidens*; DI, *Delphinapterus leucas*; Tt, *Tursiops truncatus*; F, female; M, male;  $M_b$ , body mass; AVO, aortic valve orifice;  $f_R$ , breathing frequency (mean±s.d.). Approximate year of birth is shown for wild-caught animals or year born for animals born under human care. \*Previously published data (Fahlman et al., 2019b).

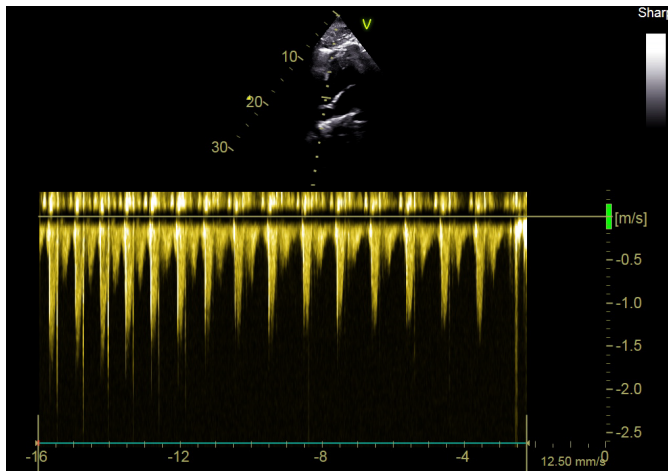

**Fig. 1. Transthoracic echocardiography immediately following a breath in a bottlenose dolphin.** The image shows the Doppler flow profile at the left ventricular outflow tract using continuous flow Doppler. The flow begins as the aortic valve opens, which increases the flow velocity up to its maximum peak velocity, followed by a continuous decrease until aortic valve closure. The figure shows how heart rate ( $f_H$ ; duration between peaks) and stroke volume (SV; area under each curve) changes throughout the interbreath interval.

#### Ultrasound acquisition of $f_H$ and SV

The ultrasound machine (Vivid-I or Vivid-IQ, General Electric), with a 1–3 MHz phased array probe, was used to obtain left ventricular blood flow and velocities in continuous movie recordings up to 16 s in duration (Fahlman et al., 2019b; Miedler et al., 2015).  $f_H$  was estimated from the flow traces, and SV was calculated from the velocity time integral of the systolic blood flow at the level of the left ventricular outflow tract multiplied by the cross-sectional area of the aortic valve orifice (the radius of the aortic valve orifice squared multiplied by  $\pi$ ). The velocity time integral was evaluated using continuous flow Doppler in flow direction from the left ventricle into the aorta, and an angle correction was used to measure the flow parallel to its path. The aortic diameter at the level of valve insertion at the different cardiac phases was measured to confirm that it was constant for all flow rates. The CO was estimated as:  $CO = f_H \times SV$ .

#### ECG acquisition of continuous $f_H$

The ECG was recorded using three gold-plated electrodes mounted inside a silicone suction cup connected to a custom-built data recorder (UUB/1-ECGb, UFI, Morro Bay, CA, USA). The suction cups were filled with conducting gel (Ten20 Conductive Neurodiagnostic Electrode paste, Waver and Company, Aurora, CO, USA) before being placed on the ventral side of the animal in a

triangle or in a line down the sternum (Bickett et al., 2019; Cauture et al., 2019). The cetacean was instructed to turn ventral side up and the suction cups were placed on the skin; once a clear ECG signal was detected, the animal rolled over to the dorsal side up. Occasionally, the ECG signal was lost as the animal rolled and the procedure was repeated until a good signal was recorded when the cetacean was in a still position with the dorsal side up (Bickett et al., 2019; Cauture et al., 2019). The ECG was recorded at 400 Hz using a data acquisition system (Powerlab 8/35, ADInstruments, Colorado Springs, CO, USA), and displayed on a computer running LabChart (v.8.1.13, ADInstruments). Initially, the electrodes were adjusted to ensure a clear ECG trace. Next, the animal was allowed to breathe spontaneously for up to 10 min and the timing of each breath recorded.

The ECG was analyzed using the heart rate detection software in LabChart, which automatically detected the R-peaks, using the following settings; typical QRS width 80 ms, R-waves 300 ms, pre-P baseline 120 ms, maximum PR 240 ms, maximum RT 400 ms. Following the automatic detection, the R-peaks were manually verified and the  $if_H$  determined from the time between R–R peaks. Noisy sections, or possible beats that did not contain a clear R-peak were removed.

#### Data assessment and statistical analysis

We compared the data for inactive animals within and between individuals. The relationship between a dependent variable ( $f_H$ , SV and CO) and the experimental covariate,  $M_b$ , was analyzed using linear-mixed effects models (lme, R version 3.3.3, <http://www.R-project.org/>). We  $\log_{10}$ -transformed the variables to generate linear functions that could be used with the lme function in R. The individual animal was treated as a random effect, which accounted for the correlation between repeated measurements on the same individual (Littell et al., 1998). Normality for all models was confirmed by the qqnorm plot. Best models of remaining variables were chosen by the log-likelihood (LL) ratio test. Acceptance of significance was set to the  $P < 0.05$  level, while  $0.05 < P < 0.1$  was considered a trend. Data are presented as the mean  $\pm$  s.d., unless otherwise stated.

## RESULTS

### Cardiorespiratory dynamics

We measured  $f_H$  and SV, and calculated CO in the bottlenose dolphin, false killer whale and juvenile beluga whale using transthoracic echocardiography. The changes in  $if_H$  and iSV associated with respiration are shown in Fig. 1 for the bottlenose dolphin. Similar dynamic changes in  $if_H$  and iSV were seen in both the false killer whale and juvenile beluga whale. A representative figure of continuous  $if_H$  shows that five species experienced a

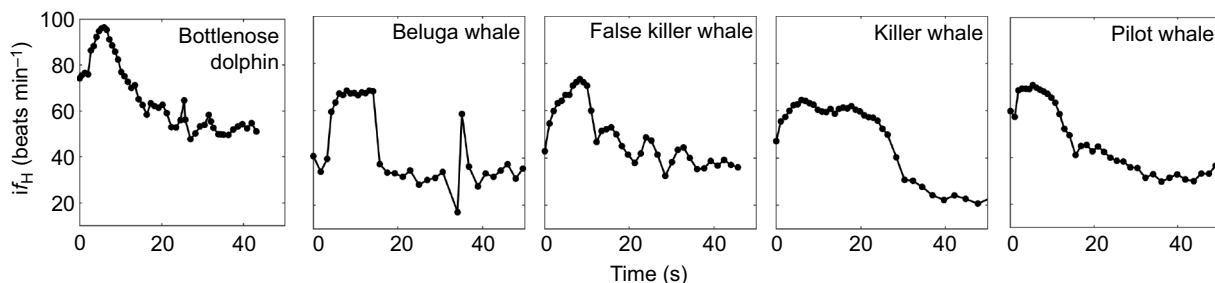

**Fig. 2. Representative instantaneous  $f_H$  ( $if_H$ ) against time following a breath in a bottlenose dolphin, a beluga whale calf, an adult false killer whale, an adult killer whale and an adult pilot whale.**



pronounced RSA, where the maximum  $if_H$  occurred approximately 3–5 s following the breath, and then slowly decayed towards a stable  $if_H$  (Fig. 2). This stable value we define as the RSA-corrected  $f_H$  for an inactive animal.

To better define the changes in cardiovascular function associated with breathing, we determined  $if_H$  and iSV in four bottlenose dolphins where it was possible to visualize the heart during all phases of the respiratory cycle. The measurements started at the end of the inhalation and continued for the next 16 s, the maximal duration possible to record continuous data using this ultrasound machine. The data are shown in Fig. 3, where both  $if_H$  (Fig. 3A) and iSV (Fig. 3B) increased, and then exponentially decayed towards the values for an inactive dolphin approximately 12–20 s following the breath (Fig. 2). The data were  $\log_{10}$ -transformed, and the exponential decay function for  $if_H$  (beats  $\text{min}^{-1}$ ) was:  $\log_{10}(if_H) = 1.912 - 0.172 \times \log_{10}(\text{time})$  ( $\chi^2 = 148$ ,  $P < 0.01$ ; Fig. 3A), where time is in seconds. The same relationship for iSV (ml) was:  $\log_{10}(iSV) = 2.402 - 0.090 \times \log_{10}(\text{time})$  ( $\chi^2 = 131$ ,  $P < 0.01$ ; Fig. 3B). There was a significant correlation within each individual between the  $if_H$  and iSV following the breath ( $iSV = 112.6 + 1.719if_H$ ,  $\chi^2 = 78$ ,  $P < 0.01$ ; Fig. 3C).

### $f_H$ , SV and CO during rest

For an analysis between animals and species, we used the RSA-corrected  $f_H$ , SV and CO for an inactive animal. This was done by extracting the average  $f_H$ , SV and CO at least 12–20 s following a spontaneous breath, and after the  $f_H$  and SV had been observed to stabilize for 5–7 s following the breath (Figs 1–3) (Fahlman et al., 2019b; Miedler et al., 2015). For each animal and measurement, a minimum of at least 3 repeated measurements of  $f_H$  and SV were made and averaged. Fig. 4 shows the average RSA-corrected  $f_H$ , SV and CO for the bottlenose dolphins, adult false killer whale and beluga whale calf. Also shown in this figure are the predicted  $f_H$ , SV and CO for a 170 kg and 520 kg terrestrial mammal (Bishop, 1997; Seymour and Blaylock, 2000; Stahl, 1967). For these data, the  $f_H$  was significantly higher, and SV and CO significantly lower in the dolphin as compared with both the similar-sized beluga whale and the heavier adult false killer whale. The average mass-specific  $f_H$  ( $sf_H$ ), was significantly higher for the dolphins (one sample  $t$ -test,  $P < 0.01$ ,  $t = 15.8$ , d.f. = 10) as compared with the false killer whale ( $sf_H$ : dolphin  $0.265 \pm 0.044$  beats  $\text{min}^{-1} \text{kg}^{-1}$ , false killer whale  $0.056 \pm 0.010$  beats  $\text{min}^{-1} \text{kg}^{-1}$ , beluga whale  $0.236 \pm 0.038$  beats  $\text{min}^{-1} \text{kg}^{-1}$ ), while both mass-specific SV ( $sSV$ : dolphin  $1.07 \pm 0.24$  ml  $\text{kg}^{-1}$ , false killer whale  $1.22 \pm 0.24$  ml  $\text{kg}^{-1}$ , beluga whale  $3.06 \pm 0.21$  ml  $\text{kg}^{-1}$ ) and CO ( $sCO$ : dolphin  $47.1 \pm 10.5$  ml  $\text{min}^{-1} \text{kg}^{-1}$ , false killer whale  $38.2 \pm 14.8$  ml  $\text{min}^{-1} \text{kg}^{-1}$ , beluga whale  $116.6 \pm 17.3$  ml  $\text{min}^{-1} \text{kg}^{-1}$ ) were significantly higher for the beluga whale calf as compared with the dolphins ( $sSV$ ,  $P < 0.01$ ,  $t = 27.5$ , d.f. = 10;  $sCO$ ,  $P < 0.01$ ,  $t = 21.8$ , d.f. = 10).

The diameter of the aortic valve orifice of the false killer whale ( $t = 73.5$ ,  $P < 0.01$ ) and that of the beluga whale calf ( $t = 40.8$ , Table 1) were both significantly larger as compared with the average aortic diameter of the bottlenose dolphins (mean  $\pm$  s.d.  $3.3 \pm 0.2$  cm,  $P < 0.01$ ), but there was no difference in aortic valve orifice diameter with  $M_b$  within the dolphins ( $F_{1,9} = 0.2$ ,  $P > 0.6$ ; Table 1).

### Estimating average $f_H$ , SV and CO for a range of $f_R$

From Fig. 3, the average RSA-corrected  $f_H$  and SV (from around 12–16 s) of an inactive animal would be approximately 48 beats  $\text{min}^{-1}$  and 192 ml, respectively, resulting in a CO of about 9.3 l  $\text{min}^{-1}$ . Using the regression equations for Fig. 3A,B (see ‘Cardiorespiratory dynamics’, above) for the uncorrected  $f_H$  and SV

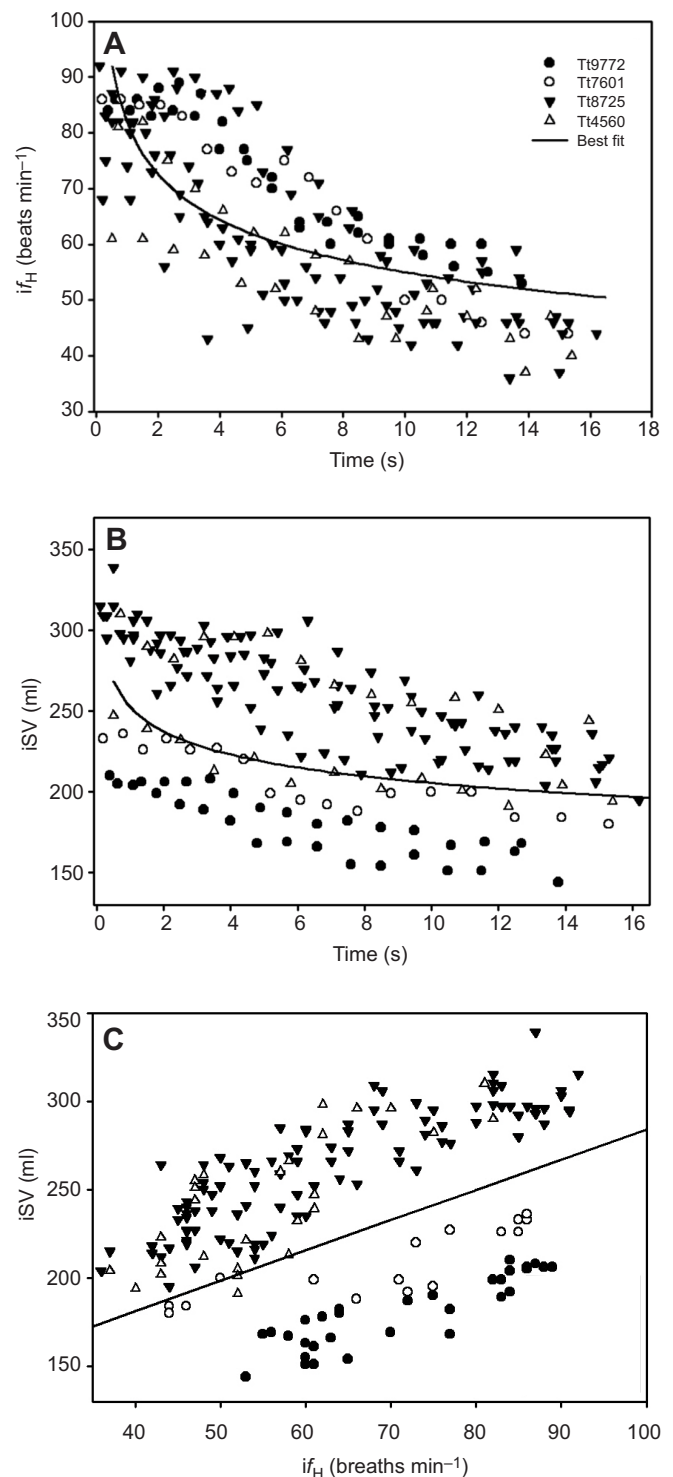

**Fig. 3. Scatter plot showing the change in  $if_H$  and instantaneous stroke volume (iSV) immediately following a breath in four bottlenose dolphins.** Both  $if_H$  (A) and iSV (B) increased following the end of the inhalation (time 0) of a breath and then decayed exponentially (solid line in A and B; see Results for details). (C) Correlation between  $if_H$  and iSV (solid line is the best fit regression used to predict iSV from  $if_H$ ).

for an inactive dolphin, the average  $f_H$  and SV for an  $f_R$  of 2 breaths  $\text{min}^{-1}$  would be approximately 54 beats  $\text{min}^{-1}$  and 203 ml, respectively (this is the average  $f_H$  and SV from 0 to 30 s in Fig. 3). The same calculation for an  $f_R$  of 6 breaths  $\text{min}^{-1}$  resulted

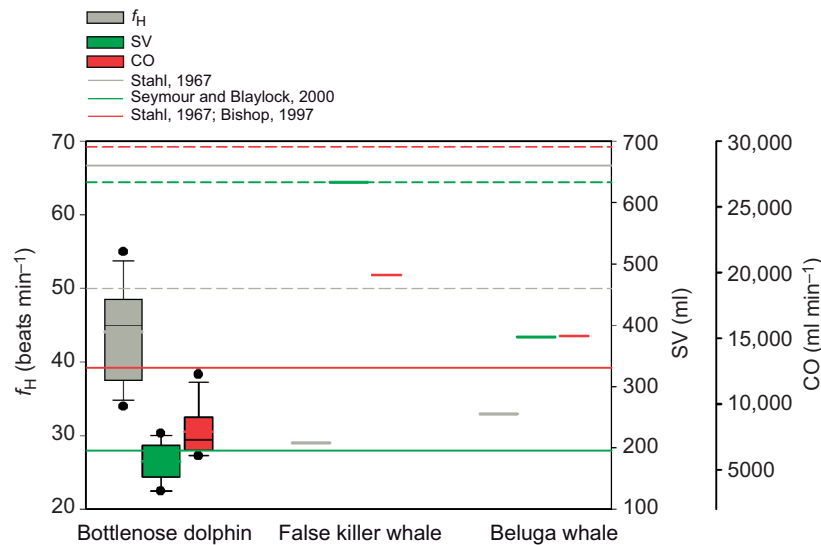

**Fig. 4.** Box plots showing average  $f_H$ , SV and cardiac output (CO) during rest in adult bottlenose dolphins, an adult false killer whale and a beluga whale calf.  $f_H$ ,  $n=13$  cetaceans with 11 dolphins; SV,  $n=11$  cetaceans with 9 dolphins; and CO,  $n=11$ . Also shown are the predicted  $f_H$  (gray), SV (green) and CO (red) horizontal lines for a 170 kg (solid line) and 520 kg (dashed line) terrestrial mammal (Bishop, 1997; Seymour and Blaylock, 2000; Stahl, 1967). The horizontal line indicates the median, the box limits are the upper and lower quartiles, whiskers are  $1.5\times$  the interquartile range and dots are outliers. As only one beluga whale and one false killer whale were measured, the average values for these species are shown as solid horizontal lines without error bars.

in an average  $f_H$  and SV of  $65 \text{ beats min}^{-1}$  and  $223 \text{ ml}$ , respectively, with a CO of  $14.5 \text{ l min}^{-1}$ . In comparison, the average  $f_H$  for an inactive animal over a 10 min period at the surface in the bottlenose dolphin, beluga whale and false killer whale was  $65\pm 9 \text{ beats min}^{-1}$  (dolphin  $f_R$ :  $4.1\pm 1.2 \text{ breaths min}^{-1}$ , range:  $2.8\text{--}6.0 \text{ breaths min}^{-1}$ ),  $44 \text{ beats min}^{-1}$  (beluga whale  $f_R$ :  $1.9\pm 1.5 \text{ breaths min}^{-1}$ ) and  $65 \text{ beats min}^{-1}$  (false killer whale  $f_R$ :  $5.4\pm 3.3 \text{ breaths min}^{-1}$ ), respectively.

To provide a comparison with an inactive terrestrial mammal with an  $M_b$  of  $170 \text{ kg}$ , the predicted  $f_R$  would be  $14 \text{ breaths min}^{-1}$  (Stahl, 1967). Using this  $f_R$  and the regression results in Fig. 3, the average  $f_H$  and SV would be approximately  $74 \text{ beats min}^{-1}$  and  $240 \text{ ml}$ , respectively.

#### Relationship between $f_R$ and $f_H$

The average  $f_R$  and  $f_H$  for the continuous  $f_H$  (ECG) from the inactive bottlenose dolphin, the juvenile beluga whale, the false killer whale, the pilot whale and the killer whale are plotted in Fig. 5. In the plot, we also included published data for the harbor porpoise (*Phocoena phocoena*), the adult beluga whale (*Delphinapterus leucas*) and gray whale (*Eschrichtius robustus*) (Bickett et al., 2019; Elmegaard et al., 2019; Ponganis and Kooyman, 1999; Wahrenbrock et al., 1974). The regression for the cetaceans was:  $f_H = 24.8 + 11.9 f_R$  (Fig. 5). As a comparison we plotted the regression for the allometric estimate from terrestrial mammals for  $f_R$  and  $f_H$  (Stahl, 1967). While the allometric equations developed by Stahl (1967) were from rat to human ( $200 \text{ g}$  to about  $80 \text{ kg}$ ), we added points for the donkey (*Equus asinus*,  $M_b$   $165\text{--}190 \text{ kg}$ ) (Yousef and Dill, 1969), the Thoroughbred horse (*Equus ferus caballus*,  $M_b$   $448 \text{ kg}$ ) (Kuwahara et al., 1996), the African elephant (*Loxodonta africana*), the Asian elephant (*Elephas maximus*) ( $M_b$   $1420\text{--}6000 \text{ kg}$ ) (Benedict and Lee, 1936; Honeyman et al., 1992; Olivares et al., 2019) and the hibernating American black bear (*Ursus americanus*) (Laske et al., 2010) (Fig. 5).

#### DISCUSSION

This is the first study to report comparative cardiac ( $f_H$ , SV and CO) measurements in inactive small and medium-sized cetaceans. We show that both  $f_H$  and SV vary during the respiratory cycle in the bottlenose dolphin, false killer whale and beluga whale, and that  $f_H$  varies in the killer whale and pilot whale. The data indicate that the RSA-corrected  $f_H$  for an inactive cetacean is lower in comparison to

studies reporting a temporal average  $f_H$ , reflecting the importance of separating the effect of respiration on  $f_H$  for comparative purposes. Our data support that changes in CO are caused by dual changes in  $f_H$  and SV, but the former changes relatively more for a given change in CO. Of special interest is the higher mass-specific SV and CO in the beluga whale calf as compared with the similar-sized dolphins and the larger false killer whale, possibly reflecting increased metabolic demand due to active growth. A sensitivity analysis was done using the temporal responses in  $f_H$  and iSV to evaluate the variation in resting  $f_H$  with varying  $f_R$ . In addition, we show that in cetaceans the RSA appears to follow a similar time course and that  $f_H$  responds more strongly to variation in  $f_R$  in cetaceans as compared with terrestrial mammals. We propose that RSA may be physiologically important to enhance gas exchange matching during the surface interval to minimize recovery duration (Andrews et al., 2000; Fahlman et al., 2018; Fedak et al., 1988). The data presented in the current study provide valuable comparisons within and between species that are important to understand physiological limitations in cetaceans. Furthermore, these data highlight the significance of access to animals under managed care that provide physiological measurements under voluntary conditions.

#### Changes in CO during RSA are made by variation in both $f_H$ and SV

In past studies, changes in CO during maximal exercise in land mammals appeared to be mainly regulated by an increase in  $f_H$  (Evans and Rose, 1988; Taylor et al., 1987). Similar results have been reported in pinnipeds during voluntary and forced breath-holds, but there have also been instances where SV changed substantially both during static breath-holds and active submerged swimming (Blix et al., 1983, 1976; Elsner et al., 1964; Murdaugh et al., 1966; Ponganis et al., 2006, 1991, 1990). Recently, considerable changes in SV were reported in voluntarily participating bottlenose dolphins following exercise, or during and following static breath-holds (Fahlman et al., 2019b; Miedler et al., 2015). Immediately following a brief bout of high-intensity exercise, the RSA-corrected  $f_H$  increased by  $104\%$  and iSV by  $63\%$  (Miedler et al., 2015). During a static breath-hold, the average RSA-corrected iSV decreased by between  $1\%$  and  $21\%$  while the average RSA-corrected  $f_H$  decreased by  $18\%$  (Fahlman et al., 2019b). During recovery, the RSA-corrected iSV and  $f_H$  increased by as much as  $34\%$  and  $117\%$ , respectively.

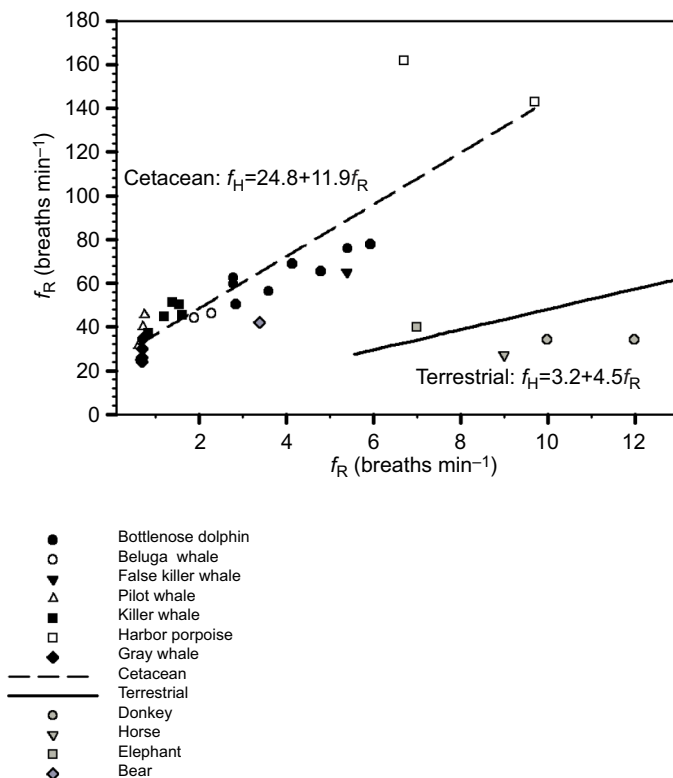

**Fig. 5. Scatter plot showing  $f_H$  and breathing frequency ( $f_R$ ) for different cetaceans.** Data for bottlenose dolphin, beluga whale, false killer whale, pilot whale and killer whale are from the present study. Data for harbor porpoise (*Phocoena phocoena*) and gray whale (*Eschrichtius robustus*), and additional data for the killer whale, pilot whale and adult beluga whale are from previous studies (Bickett et al., 2019; Elmegaard et al., 2019; Ponganis and Kooyman, 1999; Wahrenbrock et al., 1974). The regression for the cetacean data was:  $f_H = 24.8 + 11.9f_R$ ,  $r^2 = 0.82$ . The regression for  $f_H$  ( $f_H = 241M_b^{-0.25}$ ) and  $f_R$  ( $f_R = 53.5M_b^{-0.26}$ ) for terrestrial mammals was created from the allometric relationships presented in Stahl (1967) measured from rat to human (0.2–80 kg). The regression line was extrapolated for values beyond this body mass range, from 200 kg up to 6000 kg. Gray points are for the donkey (165–190 kg) (Yousef and Dill, 1969), the Thoroughbred horse (*Equus ferus caballus*, 448 kg) (Kuwahara et al., 1996) and the African (*Loxodonta africana*) and Asian elephant (*Elephas maximus*, 1420–6000 kg) (Benedict and Lee, 1936; Honeyman et al., 1992; Olivares et al., 2019). The data for the hibernating American black bear (*Ursus americanus*) were digitally extracted (Laske et al., 2010) to show comparative data in the same range of  $f_R$  as for cetaceans.

Thus, similar to the studies in terrestrial and marine mammals, the changes in RSA-corrected CO in the bottlenose dolphin appear to be influenced more by changes in  $f_H$ , but there are also considerable changes in SV, during both static diving and exercise (Fahlman et al., 2019b). In the current study, the variation in  $if_H$  and  $iSV$  changed predictably following and between breaths, and a 56% decrease in  $if_H$  (from 90 beats  $\text{min}^{-1}$  to 40 beats  $\text{min}^{-1}$ ) caused a 32% decrease in  $iSV$  (Fig. 3C).

#### Correctly defining $f_H$ of an inactive marine mammal is crucial to assess the magnitude of the dive response

Studies have focused on assessing the magnitude of the dive response as the difference between the  $f_H$  during the dive and  $f_H$  for an inactive animal at the surface (Andrews et al., 1997; McDonald et al., 2018; Noren et al., 2004, 2012). In marine mammals, the aquatic breathing pattern and the cardiorespiratory coupling between  $f_H$  and  $f_R$  complicates the ability to estimate a ‘normal’  $f_H$  for an inactive animal at the surface (Andrews et al., 1997; Cauture

et al., 2019; Fahlman et al., 2019b; Fahlman et al., 2017). Because of this confounding effect of  $f_R$ , we propose that studies looking at the cardiovascular changes associated with diving have to account for this cardiorespiratory coupling. This is not a new suggestion, and previous studies have also expressed the importance of clearly defining a normal  $f_H$  as this would affect conclusions about whether animals experience a true bradycardia during a breath-hold (Belkin, 1964; Kooyman, 1985). In past studies, when using a more restrictive definition for normal  $f_H$ , it was shown that the freshwater river cooter did not experience a diving bradycardia, while the Weddell seal only experience a diving bradycardia during dives >8 min (Belkin, 1964; Kooyman, 1985). Thus, in species with substantial variation in  $f_H$  and SV with each breath, it is important to account for the confounding effect of RSA. Strictly defined or controlled conditions are common when measuring energy use, where, for example, the basal metabolic rate in homeotherms is measured under standard conditions (Kleiber, 1947; Pedersen et al., 2020; Rosen and Trites, 2013; Worthy et al., 2013). When an animal is not post-prandial, but the metabolic measurements are done with the animal inactive, the measurements are commonly referred to as resting metabolic rate. Comparative studies on cardiac function, e.g.  $f_H$  and SV, in contrast, generally lack strictly defined conditions that allow a direct comparison. For example, it is often not reported whether the study subjects were post-prandial (Fahlman et al., 2019b; Jones et al., 1973; Kaczmarek et al., 2018; Noren et al., 2004), even though this has been shown to alter metabolic rate and cardiac function (Young et al., 2011). Similarly, many studies investigating cardiac function either in marine or terrestrial mammals do not report  $f_R$ , despite its known effect on  $f_H$  (Cauture et al., 2019; de Burgh Daly, 1986; Guillén-Mandujano and Carrasco-Sosa, 2014). While this may not be critically important for studies on animals that breathe more or less continuously, even terrestrial mammals experience considerable variation in  $f_H$  when breathing intermittently (Laske et al., 2010). In marine mammals, and specifically cetaceans, where breaths are separated by long respiratory pauses and significant changes in both  $f_H$  and SV have been observed following a breath (Figs 1–3), how much variation in average  $f_H$  do changes in  $f_R$  cause?

As an example of the impact of  $f_R$  on  $f_H$ , the mean ( $\pm$ s.d.)  $f_H$  for the false killer whale was  $48 \pm 7$  beats  $\text{min}^{-1}$  during a period when  $f_R$  was 1 breath  $\text{min}^{-1}$ , as compared with  $70 \pm 9$  beats  $\text{min}^{-1}$  when  $f_R$  was 4 breaths  $\text{min}^{-1}$ . In the bottlenose dolphin, the  $if_H$  varies from around 80–100 beats  $\text{min}^{-1}$  immediately following an inspiration, to between 35 and 50 beats  $\text{min}^{-1}$  between breaths (Fig. 3 and see fig. 1 in Cauture et al., 2019). Consequently, the  $f_R$  significantly affects the  $f_H$  for an inactive animal when measuring the number of beats over a pre-determined duration, and is especially dependent on where in the breathing cycle  $f_H$  is measured. In previous studies in the bottlenose dolphin, where the effect of  $f_R$  was not evaluated or considered, the  $f_H$  for an inactive animal was between 78 and 105 beats  $\text{min}^{-1}$  (Noren et al., 2004, 2012; Williams et al., 1993, 2015). From these comparisons it may be prudent to suggest that the measurement conditions, such as fasted or fed, and  $f_R$  should be reported. In addition, the conditions for  $f_H$  for an inactive animal need to be clearly defined to allow comparisons between studies and species (Belkin, 1964; Kooyman, 1985). This may be particularly important in studies that attempt to evaluate the evolutionary significance of the dive response, and those used to compare cardiac measurements across species, especially marine and terrestrial, as the results may be affected by  $f_R$ . By using RSA correction, comparisons within and between species and activity states (inactive, swimming, diving) could be made and be



independent of  $f_R$  (Cauture et al., 2019; Fahlman et al., 2019b; Miedler et al., 2015).

### Evaluation of the limitations of RSA-corrected values

From the data presented here and in previous studies (Andrews et al., 1997; Bickett et al., 2019; Cauture et al., 2019; Fahlman et al., 2019b; Harms et al., 2013; Kaczmarek et al., 2018; McDonald et al., 2018; Miedler et al., 2015), it appears that  $f_R$  can have a significant effect on measured cardiac function. While terrestrial mammals experience large changes in  $f_H$  when  $f_R$  is modified (Laske et al., 2010; Mortola et al., 2016), we are not aware of any study in terrestrial mammals that have attempted to remove the effect of  $f_R$  on  $f_H$ , making direct comparisons difficult. With increasing  $f_R$ , the RSA becomes less obvious as the average  $f_H$  during the interbreath interval remains elevated. The almost continuous breathing pattern in terrestrial mammals may be one reason why the effect of  $f_R$  on  $f_H$  has not been considered in comparative studies.

However, while RSA-correcting data may provide comparative cardiac indices, it does not provide a true estimate of the average  $f_H$ , SV or CO in an inactive cetacean as it omits the dynamic period from the end of the breath until the  $if_H$  and iSV have stabilized after about 12–20 s (Figs 1–3). Thus, the period of elevated  $if_H$  and iSV is not accounted for, and the estimated value would be lower than the value from continuous measurements. Using the temporal relationships between time,  $if_H$  and iSV (see Results, ‘Cardiorespiratory dynamics’) the average  $f_H$  and SV for different  $f_R$  were estimated. For an  $f_R$  of 2 breaths  $\text{min}^{-1}$ , the average  $f_H$ , SV and CO would be 11% (e.g. 54 beats  $\text{min}^{-1}$  as compared with 48 beats  $\text{min}^{-1}$ ; see Results, ‘Estimating average  $f_H$ , SV and CO for a range of  $f_R$ ’), 6% and 16% higher than the RSA-corrected value. At an  $f_R$  of 6 breaths  $\text{min}^{-1}$  the same values would be 25%, 14% and 35% higher than the RSA-corrected value, respectively. For an  $f_R$  of a terrestrial mammal of 170 kg, the average values would be similar to those predicted from a terrestrial mammal (Fig. 4). Thus, when accounting for the differences in  $f_R$  it appears that the average  $f_H$  and SV are similar between marine and terrestrial mammals of comparable body size. However, these calculations are done for the bottlenose dolphin, and clearly a better understanding of the cardiorespiratory coupling in mammals is important to correctly assess physiological differences without confounding effects between species.

### Species differences in RSA-corrected $f_H$ , SV and CO are not only due to size

While the RSA-corrected  $f_H$  and SV do not account for the values during the dynamic period, they do provide values that are not confounded by breathing and can therefore be used for comparative purposes between species. The data in Fig. 4 show that the RSA-corrected  $f_H$  was lower than that predicted from terrestrial mammals by between 34% and 51% for all species (Fig. 4). The RSA-corrected SV for an inactive animal was 94% greater in the juvenile beluga whale as compared with the predicted value from a 170 kg terrestrial mammal (Fig. 4; Bishop, 1997; Seymour and Blaylock, 2000; Stahl, 1967). In the dolphin, the RSA-corrected SV was 9% lower compared with that of a similar-sized terrestrial mammal (Fig. 4), while for the false killer whale, the RSA-corrected SV was almost the same as that of a similar-sized terrestrial mammal (Fig. 4) (Seymour and Blaylock, 2000). The RSA-corrected CO in the dolphin and false killer whale was 34% and 33% lower, respectively, as compared with that of a similar-sized terrestrial mammal (Bishop, 1997; Stahl, 1967). In the beluga whale, in contrast, the RSA-corrected CO was 19% higher as compared with that of a terrestrial mammal of similar size, mainly due to the high SV. Interestingly, both the RSA-corrected resting SV and CO were

considerably higher in the beluga whale calf as compared with the bottlenose dolphins of similar size (Fig. 4). As heart size correlates directly with  $M_b$  during ontogeny in smaller cetaceans (Mallette et al., 2016; McLellan et al., 2002), it is unlikely that these differences are caused by variation in heart size and body mass growth. However, the aortic valve orifice was greater in both the larger adult false killer whale and juvenile beluga whale as compared with dolphins. Thus, aortic valve orifice diameter may be an important anatomical bottleneck in cardiovascular performance as its size appears to limit SV, and thereby CO. Anatomical data on aortic valve orifice diameter from different species, age classes and sexes would be interesting to investigate how anatomy may limit cardiovascular performance.

### Cardiorespiratory coupling in inactive marine and terrestrial mammals and its ecophysiological significance

To compare the cardiorespiratory coupling between species, we plotted  $f_R$  and  $f_H$  from bottlenose dolphin, false killer whale, juvenile beluga whale, killer whale and pilot whale. Reported data for the harbor porpoise, adult beluga whale and gray whale that were available from the literature were also included (Bickett et al., 2019; Elmegaard et al., 2019; Ponganis and Kooyman, 1999; Wahrenbrock et al., 1974). This regression provides an estimate how  $f_H$  varies with changes in  $f_R$  between cetaceans (Fig. 5). As a comparison we plotted  $f_R$  and  $f_H$  for terrestrial mammals using allometric equations (Stahl, 1967). We also added data points for the donkey, Thoroughbred horse and elephant as the allometric equations developed by Stahl (1967) did not account for animals larger than humans. The resulting regression showed that the slope of the regression of  $f_R$  and  $f_H$  is much greater in the cetacean than in terrestrial mammals extrapolated from the allometric equations by Stahl (1967). This is a conservative estimate, as the addition of data points for the elephant, horse and donkey in the  $M_b$  range from 165 to 6000 kg suggests that the regression for terrestrial mammals is even less steep. In other words, for each breath in a cetacean there are almost 12 heart beats, while for a terrestrial mammal there are 3 (Fig. 5). This difference is due to a large change in  $f_H$  for each breath in the cetacean, causing a greater RSA as compared with a terrestrial mammal. In humans, a breath causes a change in  $f_H$  of between 10 and 20 beats, while in the bottlenose dolphin this variation is between 40 and 60 beats (Cauture et al., 2019; Mortola et al., 2016). The results here further support this and show that  $f_H$  changes associated with  $f_R$  are greater in cetaceans (Fig. 5), and the dynamic changes between breaths are consistent between cetacean species (Fig. 3) and affect both  $f_H$  and SV (Fig. 2). Past work has shown that the  $f_H f_R^{-1}$  is significantly greater not only in cetaceans but also in a larger range of marine mammals (Mortola, 2015). It was suggested that this is a non-respiratory adaptation to provide additional buoyancy. While this is an interesting suggestion, we propose that this greater cardiopulmonary coupling may be a physiological trait that help improve gas exchange. Interestingly, when overlaying the data for the hibernating bear, although lower, it is closer to the line for the cetaceans as compared with the terrestrial mammals (Fig. 5). It was suggested that this extensive RSA in the hibernating bear would help conserve cardiac work while respiratory coupled tachycardia would help to maintain gas exchange and tissue perfusion (Laske et al., 2010). In the elephant seal, it was suggested that the differences in cardiorespiratory responses at sea versus on land could be a way to ensure rapid recovery rather than adequate gas exchange (Andrews et al., 2000). Thus, the steeper slope for cetaceans may indicate a greater cardiovascular response for each breath, which may help maximize gas exchange during short surface intervals.

In the northern elephant seal (*Mirounga angustirostris*), development of RSA appears to correlate positively with the duration of an apneic event, and negatively with both apneic and eupneic  $f_H$  (Castellini et al., 1994b). It was also reported that the changes in  $f_H$  during diving at sea, during a sleep apnea on land, or with RSA were similar and it was suggested that these may be regulated by a similar mechanism (Castellini et al., 1994a). In another study, the average  $f_H$  and  $f_R$  while at the surface at sea were considerably higher ( $f_H$ :  $107 \pm 3$  beats  $\text{min}^{-1}$ ;  $f_R$ :  $22.0 \pm 2.0$  breaths  $\text{min}^{-1}$ ) as compared with those on land ( $f_H$ :  $65 \pm 8$  beats  $\text{min}^{-1}$ ;  $f_R$ :  $9.2 \pm 1.3$  breaths  $\text{min}^{-1}$ ), but the mean apnea  $f_H$  was not different at sea or on land (Andrews et al., 2000). Thus, the higher  $f_H$  at the sea surface may, at least in part, be confounded by a higher  $f_R$  as the animal returns to the surface to breathe. In a study on harbor seals, it was noted that at times the seals performed what was termed 'top-up' dives, where the seal spent a brief moment at the surface, only long enough to take a single breath, and then submerged again (Fedak et al., 1988). It was suggested that these top-up dives could be important circulatory events that helped improve gas exchange and reduce recovery time (Andrews et al., 1997; Fedak et al., 1988). A more recent theoretical study showed that the cardiac responses during the surface interval following shallow and deep diving in bottlenose dolphins is to maximize gas exchange, which helps to replenish more rapidly the  $\text{O}_2$  stores and remove the  $\text{CO}_2$  and thereby minimize the surface duration (Fahlman et al., 2018). Thus, the greater cardiovascular response to breathing in marine mammals may be a physiological trait that ensures rapid gas exchange and helps reduce the surface interval during a foraging bout.

## Conclusions

This is the first study to report comparative semi-continuous measurements of  $f_H$ , SV and CO, and continuous ECG in a range of small and medium-sized odontocetes. We have shown that both  $i f_H$  and  $iSV$  initially increase and then decrease exponentially following a breath, which agrees with data from static breath-holds and following high-intensity exercise in the bottlenose dolphin (Fahlman et al., 2019b; Miedler et al., 2015). Of special interest is the higher mass-specific SV and CO in the beluga whale calf as compared with that in similar-sized dolphins and the larger false killer whale, possibly reflecting increased metabolic demand due to active growth. In addition, we show that in cetaceans,  $f_H$  responds more strongly to variation in  $f_R$  as compared with that in terrestrial mammals, resulting in a greater RSA in the former. We propose that RSA may be important to maximize gas exchange at the surface to minimize the time at the surface between dives. The data presented in the current study provide valuable comparisons within and between species that are important to understand physiological limitations in cetaceans.

## Acknowledgements

A special thanks to all the trainers and staff at Dolphin Quest-Oahu, the Oceanographic and Sea Life Park-Oahu, and to Laura Surovik and the animal training staff at SeaWorld Orlando who made this study possible through their dedication and motivation. Dolphin Quest, the Oceanographic, SeaWorld Orlando and Sea Life Park kindly supported us by providing animals, crew and access to resources. This is a SeaWorld Parks and Entertainment Corporation technical contribution number TC-2020-01. A special thanks to Ann Pabst for the discussion about anatomical ontogeny in dolphins, and for sending the data. We would like to thank Peter Madsen for lending us the mold for the ECG suction cups. A special thank you to Jacopo Mortola for stimulating discussions about cardiorespiratory function in marine mammals. We are grateful for the excellent comments made by the referees on earlier versions of the manuscript, which helped change the scope and direction of the objectives, and we would like to thank them for their helpful criticism.

## Competing interests

The authors declare no competing or financial interests.

## Author contributions

Conceptualization: A.F., S.M., A.B.; Methodology: A.F., S.M., D.F.F., P.M.C., J.A., J.R.L., T.R., A.B.; Validation: A.F.; Formal analysis: A.F., S.M.; Investigation: A.F., S.M., D.F.F., P.M.C., J.A., J.R.L., A.B.; Resources: A.F.; Data curation: A.F.; Writing - original draft: A.F.; Writing - review & editing: S.M., L.M.-B., D.F.F., P.M.C., J.A., J.R.L., T.R., A.B.; Supervision: A.F., L.M.-B., T.R.; Project administration: A.F., L.M.-B.; Funding acquisition: A.F.

## Funding

Funding for this project was provided by the Office of Naval Research (ONR Award # N000141613088; ONR YIP Award # N000141410563).

## Data availability

The data used in this study are available from OSF: <https://osf.io/wdfmz>

## References

- Andrews, R. D., Jones, D. R., Williams, J. D., Thorson, P. H., Oliver, G. W., Costa, D. P. and Le Boeuf, B. J. (1997). Heart rates of northern Elephant seals diving at sea and resting on the beach. *J. Exp. Biol.* **200**, 2083-2095.
- Andrews, R. D., Costa, D. P., Le Boeuf, B. J. and Jones, D. R. (2000). Breathing frequencies of northern elephant seals at sea and on land revealed by heart rate spectral analysis. *Respir. Physiol.* **123**, 71-85. doi:10.1016/S0034-5687(00)00168-7
- Belkin, D. A. (1964). Variations in heart rate during voluntary diving in the turtle *Pseudemys concinna*. *Copeia* **1964**, 321-330. doi:10.2307/1441026
- Ben-Tal, A., Shamailov, S. S. and Paton, J. F. R. (2012). Evaluating the physiological significance of respiratory sinus arrhythmia: looking beyond ventilation-perfusion efficiency. *J. Physiol.* **590**, 1989-2008. doi:10.1113/jphysiol.2011.222422
- Ben-Tal, A., Shamailov, S. S. and Paton, J. F. R. (2014). Central regulation of heart rate and the appearance of respiratory sinus arrhythmia: new insights from mathematical modeling. *Math. Biosci.* **255**, 71-82. doi:10.1016/j.mbs.2014.06.015
- Benedict, F. G. and Lee, R. C. (1936). The heart rate of the elephant. *Proc. Am. Philos. Soc.* **76**, 335-341.
- Bickett, N. J., Tift, M. S., St. J. Leger, J. and Ponganis, P. J. (2019). Heart rates, heart rate profiles, and electrocardiograms in three killer whales, a beluga, and a pilot whale: An exploratory investigation. *Mar. Mamm. Sci.* **35**, 1112-1132. doi:10.1111/mms.12578
- Bishop, C. M. (1997). Heart mass and the maximum cardiac output of birds and mammals: implications for estimating the maximum aerobic power input of flying animals. *Philos. Trans. R. Soc. Lond. B* **352**, 447-456. doi:10.1098/rstb.1997.0032
- Blix, A. S., Kjekshus, J. K., Enge, I. and Bergan, A. (1976). Myocardial blood flow in the diving seal. *Acta Physiol. Scand.* **96**, 277-280. doi:10.1111/j.1748-1716.1976.tb01096.x
- Blix, A. S., Elsner, R. and Kjekshus, J. K. (1983). Cardiac output and its distribution through capillaries and A-V shunts in diving seals. *Acta Physiol. Scand.* **118**, 109-116. doi:10.1111/j.1748-1716.1983.tb07250.x
- Castellini, M. A., Milsom, W. K., Berger, R. J., Costa, D. P., Jones, D. R., Castellini, J. M., Rea, L. D., Sharma, S. and Harris, M. (1994a). Patterns of respiration and heart rate during wakefulness and sleep in elephant seal pups. *Am. J. Physiol. Regul. Integr. Comp. Physiol.* **266**, R863-R869. doi:10.1152/ajpregu.1994.266.3.R863
- Castellini, M. A., Rea, L. D., Sanders, J. L., Castellini, J. M. and Zenteno-Savin, T. (1994b). Developmental changes in cardiorespiratory patterns of sleep-associated apnea in northern elephant seals. *Am. J. Physiol. Regul. Integr. Comp. Physiol.* **267**, R1294-R1301. doi:10.1152/ajpregu.1994.267.5.R1294
- Cature, F., Sterba-Boatwright, B., Miedler, S., Rocho-Levine, J., Harms, C. and Fahlman, A. (2019). Using Respiratory Sinus Arrhythmia to estimate inspired tidal volume in the bottlenose dolphin (*Tursiops truncatus*). *Front. Physiol.* **10**. doi:10.3389/fphys.2019.00128
- de Burgh Daly, M. (1986). Interactions between respiration and circulation. In *Handbook of Physiology- The Respiratory System, Control of Breathing* (ed. N. S. Cherniak and J. G. Widdicombe), pp. 529-594. Bethesda, MD: American Physiological Society.
- Elmegaard, S. L., Johnson, M., Madsen, P. T. and McDonald, B. I. (2016). Cognitive control of heart rate in diving harbor porpoises. *Curr. Biol.* **26**, R1175-R1176. doi:10.1016/j.cub.2016.10.020
- Elmegaard, S. L., McDonald, B. I. and Madsen, P. T. (2019). Drivers of the dive response in trained harbour porpoises (*Phocoena phocoena*). *J. Exp. Biol.* **222**, jeb208637. doi:10.1242/jeb.208637
- Elsner, R. W., Franklin, D. L. and Van Citters, R. L. (1964). Cardiac output during diving in an unrestrained sea lion. *Nature* **202**, 809-810. doi:10.1038/202809a0
- Elsner, R., Kenney, D. W. and Burgess, K. (1966). Diving bradycardia in the trained dolphin. *Nature* **212**, 407-408. doi:10.1038/212407a0



- Evans, D. L. and Rose, R. J. (1988). Cardiovascular and respiratory responses in Thoroughbred horses during treadmill exercise. *J. Exp. Biol.* **134**, 397–408.
- Fahlman, A., Moore, M. J. and Garcia-Parraga, D. (2017). Respiratory function and mechanics in pinnipeds and cetaceans. *J. Exp. Biol.* **220**, 1761–1773. doi:10.1242/jeb.126870
- Fahlman, A., Jensen, F., Tyack, P. L. and Wells, R. (2018). Modeling tissue and blood gas kinetics in coastal and offshore common Bottlenose dolphins, *Tursiops truncatus*. *Front. Physiol.* **9**, 1–13. doi:10.3389/fphys.2018.00838
- Fahlman, A., Brodsky, M., Miedler, S., Dennison, S., Ivančić, M., Levine, G., Rocho-Levine, J., Manley, M., Rocabert, J. and Borque-Espinosa, A. (2019a). Ventilation and gas exchange before and after voluntary static surface breath-holds in clinically healthy bottlenose dolphins, *Tursiops truncatus*. *J. Exp. Biol.* **222**, 1–9. doi:10.1242/jeb.192211
- Fahlman, A., Miedler, S., Rocho-Levine, J., Jabois, A., Arenarez, J., Marti-Bonmati, L., García-Parraga, D. and Cature, F. (2019b). Re-evaluating the significance of the dive response during voluntary surface apneas in the bottlenose dolphin, *Tursiops truncatus*. *Sci. Rep.* **9**, 8613. doi:10.1038/s41598-019-45064-8
- Fedak, M. A., Pullen, M. R. and Kanwisher, J. (1988). Circulatory responses of seals to periodic breathing: heart rate and breathing during exercise and diving in the laboratory and open sea. *Can. J. Zool.* **66**, 53–60. doi:10.1139/z88-007
- Grossman, P. and Taylor, E. W. (2007). Toward understanding respiratory sinus arrhythmia: Relations to cardiac vagal tone, evolution and biobehavioral functions. *Biol. Psychol.* **74**, 263–285. doi:10.1016/j.biopsycho.2005.11.014
- Guillén-Mandujano, A. and Carrasco-Sosa, S. (2014). Additive effect of simultaneously varying respiratory frequency and tidal volume on respiratory sinus arrhythmia. *Autonom. Neurosci.* **186**, 69–76. doi:10.1016/j.autneu.2014.08.003
- Harms, C. A., Jensen, E. D., Townsend, F. I., Hansen, L. J., Schwacke, L. H. and Rowles, T. K. (2013). Electrocardiograms of bottlenose dolphins (*Tursiops truncatus*) out of water: habituated collection versus wild postcapture animals. *J. Zoo Wildl. Med.* **44**, 972–981. doi:10.1638/2013-0093.1
- Hayano, J., Yasuma, F., Okada, A., Mukai, S. and Fujinami, T. (1996). Respiratory sinus arrhythmia. A phenomenon improving pulmonary gas exchange and circulatory efficiency. *Circulation* **94**, 842–847. doi:10.1161/01.CIR.94.4.842
- Hirsch, J. A. and Bishop, B. (1981). Respiratory sinus arrhythmia in humans: how breathing pattern modulates heart rate. *Am. J. Physiol. Heart Circ. Physiol.* **241**, H620–H629. doi:10.1152/ajpheart.1981.241.4.H620
- Honeyman, V. L., Pettifer, G. R. and Dyson, D. H. (1992). Arterial blood pressure and blood gas values in normal standing and laterally recumbent African (Loxodonta africana) and Asian (Elephas maximus) Elephants. *J. Zoo Wildl. Med.* **23**, 205–210.
- Houser, D. S., Dankiewicz-Talmdge, L. A., Stockard, T. K. and Ponganis, P. J. (2010). Investigation of the potential for vascular bubble formation in a repetitively diving dolphin. *J. Exp. Biol.* **213**, 52–62. doi:10.1242/jeb.028365
- Jones, D. R., Fisher, H. D., McTaggart, S. and West, N. H. (1973). Heart rate during breath-holding and diving in the unrestrained harbor seal (*Phoca vitulina richardi*). *Can. J. Zool.* **51**, 671–680. doi:10.1139/z73-101
- Kaczmarek, J., Reichmuth, C., McDonald, B. I., Kristensen, J. H., Larson, J., Johansson, F., Sullivan, J. L. and Madsen, P. T. (2018). Drivers of the dive response in pinnipeds; apnea, submergence or temperature? *J. Exp. Biol.* **221**, jeb176545. doi:10.1242/jeb.176545
- Kleiber, M. (1947). Body size and metabolic rate. *Physiol. Rev.* **27**, 511–541. doi:10.1152/physrev.1947.27.4.511
- Kooyman, G. L. (1985). Physiology without restraint in diving mammals. *Science* **1**, 166–178. doi:10.1111/j.1748-7692.1985.tb00004.x
- Kuwahara, M., Hashimoto, S.-I., Ishii, K., Yagi, Y., Hada, T., Hiraga, A., Kai, M., Kubo, K., Oki, H., Tsubone, H. et al. (1996). Assessment of autonomic nervous function by power spectral analysis of heart rate variability in the horse. *J. Auton. Nervous Syst.* **60**, 43–48. doi:10.1016/0165-1838(96)00028-8
- Laske, T. G., Harlow, H. J., Garshelis, D. L. and Iazzo, P. A. (2010). Extreme respiratory sinus arrhythmia enables overwintering black bear survival—physiological insights and applications to human medicine. *J. Cardiovasc. Transl. Res.* **3**, 559–569. doi:10.1007/s12265-010-9185-7
- Littell, R. C., Henry, P. R. and Ammerman, C. B. (1998). Statistical analysis of repeated measures data using SAS procedures. *J. Anim. Sci.* **76**, 1216–1231. doi:10.2527/1998.7641216x
- Mallette, S. D., McLellan, W. A., Scharf, F. S., Koopman, H. N., Barco, S. G., Wells, R. S. and Ann Pabst, D. (2016). Ontogenetic allometry and body composition of the common bottlenose dolphin (*Tursiops truncatus*) from the U.S. mid-Atlantic. *Mar. Mamm. Sci.* **32**, 86–121. doi:10.1111/mms.12253
- McDonald, B. I., Johnson, M. and Madsen, P. T. (2018). Dive heart rate in harbour porpoises is influenced by exercise and expectations. *J. Exp. Biol.* **221**, jeb168740. doi:10.1242/jeb.168740
- McLellan, W. A., Koopman, H. N., Rommel, S. A., Read, A. J., Potter, C. W., Nicolas, J. R., Westgate, A. J. and Pabst, D. A. (2002). Ontogenetic allometry and body composition of harbour porpoises (*Phocoena phocoena*, L.) from the western North Atlantic. *J. Zool.* **257**, 457–471. doi:10.1017/S0952836902001061
- Miedler, S., Fahlman, A., Valls Torres, M., Álvaro Álvarez, T. and Garcia-Parraga, D. (2015). Evaluating cardiac physiology through echocardiography in bottlenose dolphins: using stroke volume and cardiac output to estimate systolic left ventricular function during rest and following exercise. *J. Exp. Biol.* **218**, 3604–3610. doi:10.1242/jeb.131532
- Mortola, J. P. (2015). The heart rate - breathing rate relationship in aquatic mammals: A comparative analysis with terrestrial species. *Curr. Zool.* **61**, 569–577. doi:10.1093/czoolo/61.4.569
- Mortola, J. P., Marghescu, D. and Siegrist-Johnstone, R. (2015). Respiratory sinus arrhythmia in young men and women at different chest wall configurations. *Clin. Sci.* **128**, 507–516. doi:10.1042/CS20140543
- Mortola, J. P., Marghescu, D. and Siegrist-Johnstone, R. (2016). Thinking about breathing: effects on respiratory sinus arrhythmia. *Respir. Physiol. Neurobiol.* **223**, 28–36. doi:10.1016/j.resp.2015.12.004
- Murdaugh, H. V. R., Robin, E. D., Millen, J. E., Drewry, W. F. and Weiss, E. (1966). Adaptations to diving in the harbor seal: cardiac output during diving. *Am. J. Physiol.* **210**, 176–180. doi:10.1152/ajplegacy.1966.210.1.176
- Noren, S. R., Cuccurullo, V. and Williams, T. M. (2004). The development of diving bradycardia in bottlenose dolphins (*Tursiops truncatus*). *J. Comp. Physiol. B Biochem. Syst. Environ. Physiol.* **174**, 139–147. doi:10.1007/s00360-003-0398-9
- Noren, S. R., Kendall, T., Cuccurullo, V. and Williams, T. M. (2012). The dive response redefined: underwater behavior influences cardiac variability in freely diving dolphins. *J. Exp. Biol.* **215**, 2735–2741. doi:10.1242/jeb.069583
- Olivares, A., Kiley-Worthington, M. and Rendle-Worthington, J. (2019). Evaluation of heart rates to measure emotionality and “stress” in semi-domestic african elephants engaged in activities with humans. *J. Vet. Res. Adv.* **1**, 62–79.
- Pedersen, M. B., Fahlman, A., Borque-Espinosa, A., Madsen, P. T. and Jensen, F. H. (2020). Whistling is metabolically cheap for communicating bottlenose dolphins (*Tursiops truncatus*). *J. Exp. Biol.* **223**, jeb212498. doi:10.1242/jeb.212498
- Piccione, G., Giudice, E., Giannetto, C. and Mortola, J. P. (2019). The magnitude of respiratory sinus arrhythmia of a large mammal (the horse) is like that of humans. *Respir. Physiol. Neurobiol.* **259**, 170–172. doi:10.1016/j.resp.2018.09.006
- Ponganis, P. J. and Kooyman, G. L. (1999). Heart rate and electrocardiogram characteristics of a young California gray whale (*Eschrichtius robustus*). *Mar. Mamm. Sci.* **15**, 1198–1207. doi:10.1111/j.1748-7692.1999.tb00885.x
- Ponganis, P. J., Kooyman, G. L., Zornow, M. H., Castellini, M. A. and Croll, D. A. (1990). Cardiac output and stroke volume in swimming harbor seals. *J. Comp. Physiol. B* **160**, 473–482. doi:10.1007/BF00258974
- Ponganis, P. J., Kooyman, G. L. and Zornow, M. H. (1991). Cardiac output in swimming California sea lions, *Zalophus californianus*. *Physiol. Zool.* **64**, 1296–1306. doi:10.1086/physzool.64.5.30156246
- Ponganis, P. J., Stockard, T. K., Levenson, D. H., Berg, L. and Baranov, E. A. (2006). Cardiac output and muscle blood flow during rest-associated apneas of elephant seals. *Comp. Biochem. Physiol. A* **144**, 105–111. doi:10.1016/j.cbpa.2006.02.009
- Reed, J. Z., Chambers, C., Hunter, C. J., Lockyer, C., Kastelein, R., Fedak, M. A. and Boutilier, R. G. (2000). Gas exchange and heart rate in the harbour porpoise, *Phocoena phocoena*. *J. Comp. Physiol. B* **170**, 1–10. doi:10.1007/s003600050001
- Rosen, D. A. S. and Trites, A. W. (2013). Resting metabolic rate of a mature male beluga whale (*Delphinapterus leucas*). *Aquat. Mamm.* **39**, 85–88. doi:10.1578/AM.39.1.2013.85
- Seymour, R. S. and Blaylock, A. J. (2000). The principle of laplace and scaling of ventricular wall stress and blood pressure in mammals and birds. *Physiol. Biochem. Zool.* **73**, 389–405. doi:10.1086/317741
- Stahl, W. R. (1967). Scaling of respiratory variables in mammals. *J. Appl. Physiol.* **22**, 453–460. doi:10.1152/jappl.1967.22.3.453
- Taylor, C. R., Karas, R. H., Weibel, E. R. and Hoppeler, H. (1987). Adaptive variation in the mammalian respiratory system in relation to energetic demand: II. Reaching the limits to oxygen flow. *Respir. Physiol.* **69**, 7–26. doi:10.1016/0034-5687(87)90098-3
- Wahrenbrock, E. A., Maruscha, G. F., Elsner, R. and Kenney, D. W. (1974). Respiration and metabolism in 2 Baleen Whale Calves. *Mar. Fish. Rev.* **36**, 3–9.
- Williams, T. M., Friedl, W. A. and Haun, J. E. (1993). The physiology of bottlenose dolphins (*Tursiops truncatus*): heart rate, metabolic rate and plasma lactate concentration during exercise. *J. Exp. Biol.* **179**, 31–46.
- Williams, T. M., Fuiman, L. E., Kendall, T., Berry, P., Richter, B., Noren, S. R., Thometz, N., Shattock, M. J., Farrell, E., Stamper, A. M. et al. (2015). Exercise at depth alters bradycardia and incidence of cardiac anomalies in deep-diving marine mammals. *Nat. Commun.* **6**, 1–9. doi:10.1038/ncomms7055
- Worthy, G. A. J., Worthy, T. A. M., Yochem, P. K. and Dold, C. (2013). Basal metabolism of an adult male killer whale (*Orcinus orca*). *Mar. Mamm. Sci.* **30**, 1229–1237. doi:10.1111/mms.12091
- Yasuma, F. and Hayano, J.-I. (2004). Respiratory sinus arrhythmia. *Chest* **125**, 683–690. doi:10.1378/chest.125.2.683
- Young, B. L., Rosen, D. A. S., Haulena, M., Hindle, A. G. and Trites, A. W. (2011). Environment and feeding change the ability of heart rate to predict metabolism in resting Steller sea lions (*Eumetopias jubatus*). *J. Comp. Physiol. B* **181**, 105–116. doi:10.1007/s00360-010-0504-8
- Yousef, M. K. and Dill, D. B. (1969). Resting energy metabolism and cardiorespiratory activity in the burro *Equus asinus*. *J. Appl. Physiol.* **27**, 229–232. doi:10.1152/jappl.1969.27.2.229
- Zena, L. A., Leite, C. A. C., Longhini, L. S., Dias, D. P. M., da Silva, G. S. F., Hartzler, L. K., Gargaglioni, L. H. and Bicego, K. C. (2017). Analysis of the respiratory component of heart rate variability in the Cururu toad *Rhinella schneideri*. *Sci. Rep.* **7**, 16119. doi:10.1038/s41598-017-16350-0
